# Supplementary material for: Zebra Finch on a Rollercoaster: How Temperature Fluctuations Affect Physiology, Learning, and Memory
Source: Research Square preprint supplement (doi:10.21203/rs.3.rs-6845435/v1), 2025-06-13
Supplement: Supplementary file 1 [file 6dec71ce24f8fcdc003e1a68.docx]

**Supplementary materials**

**Methods**

A. B.


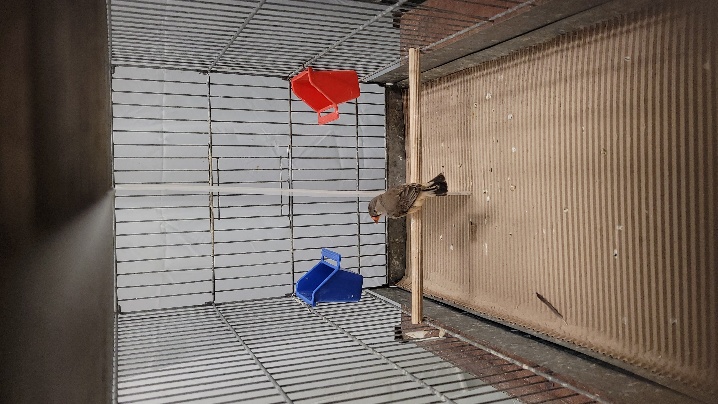
**
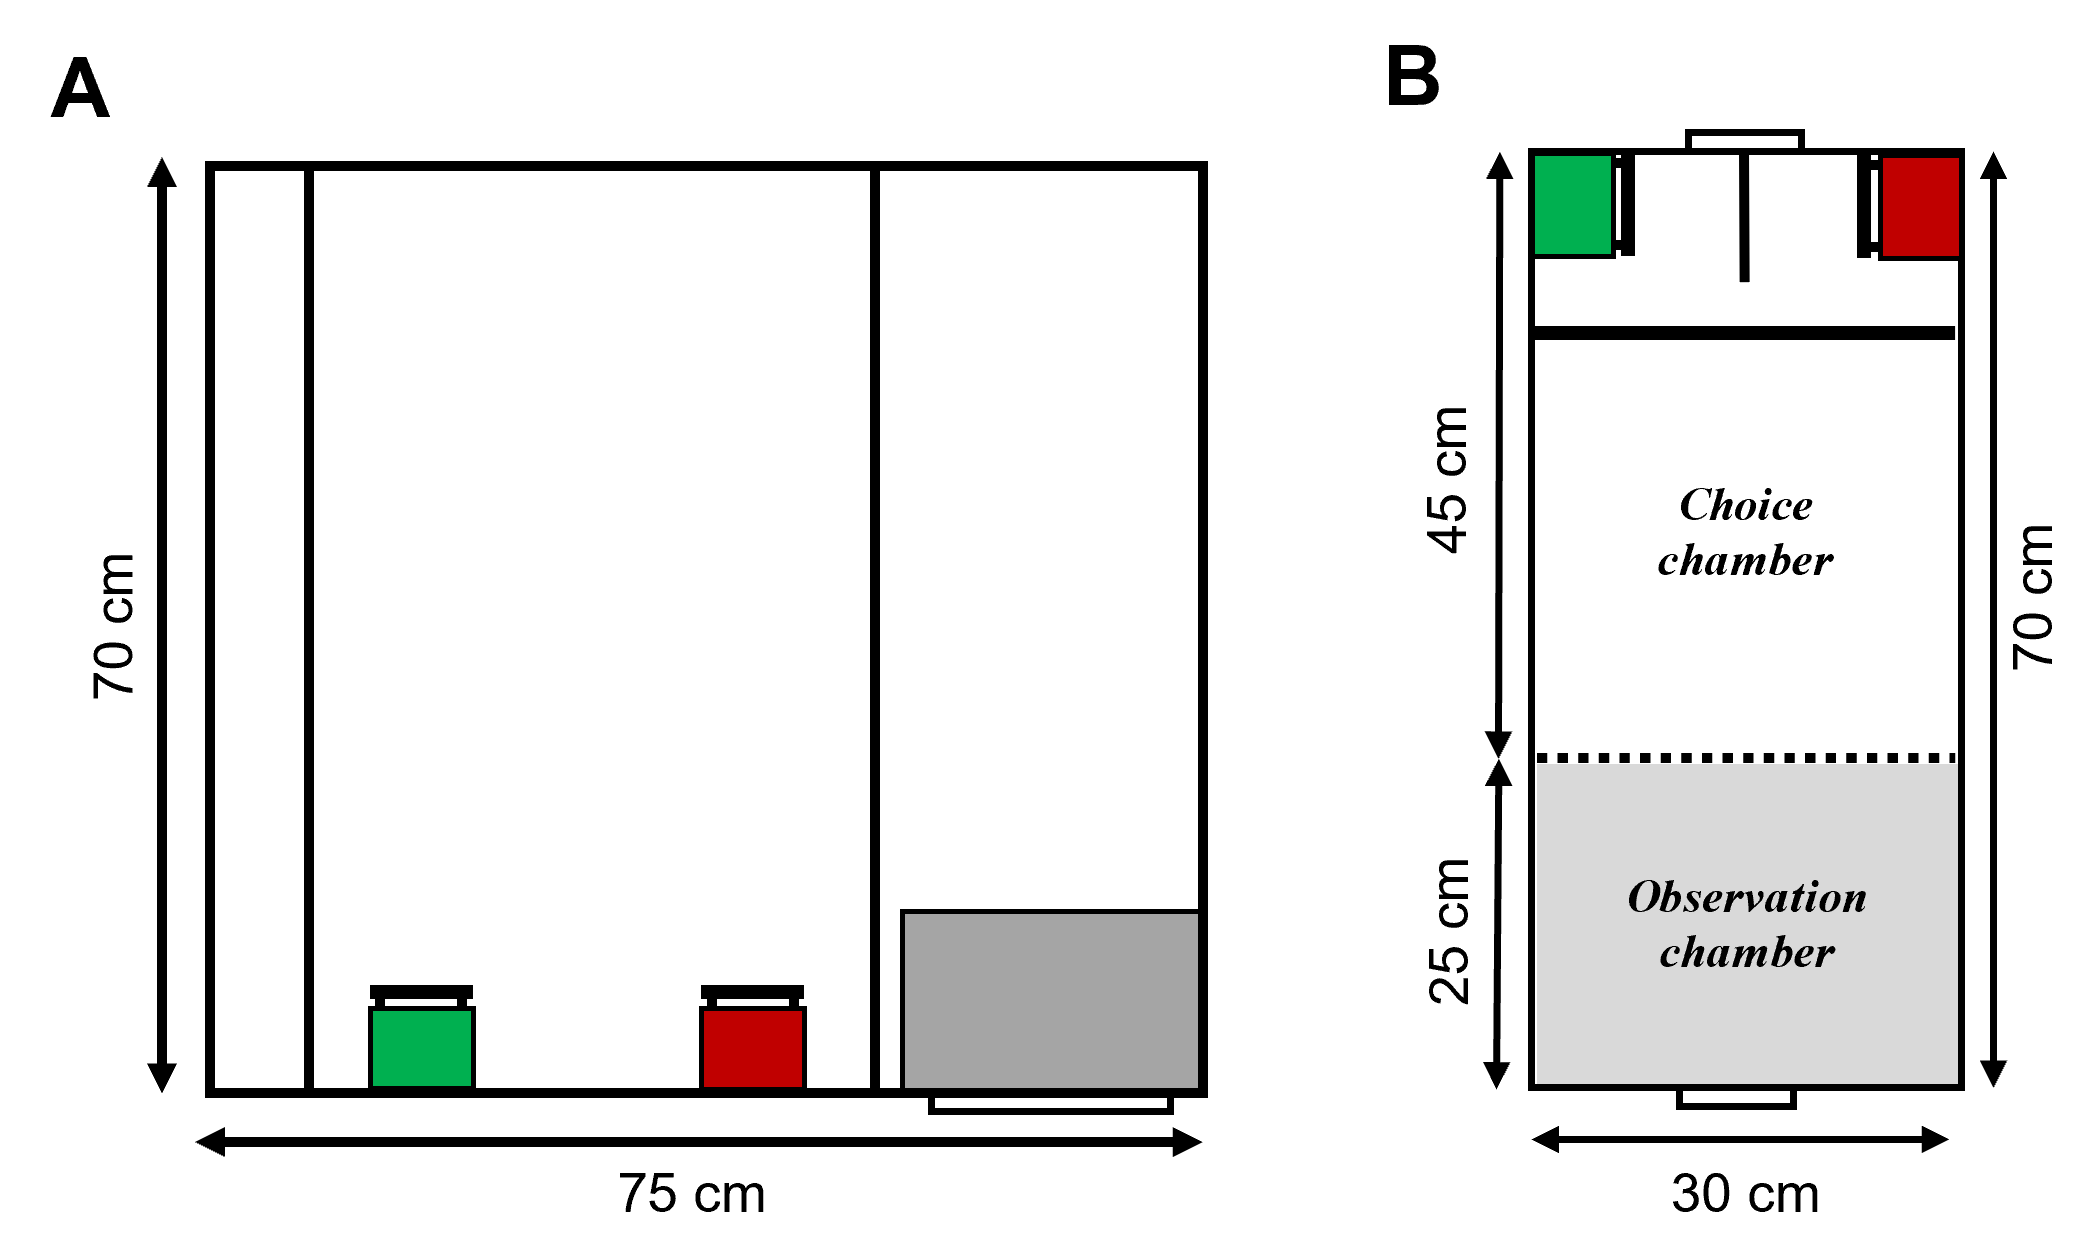
**

Figure 1. Schematic illustration of the testing cage. A) The observation chamber and choice chamber are shown. The dashed line represents the removable mesh divider, the thick black line the perch and the horizontal line the divider between the two feeders. There are two doors on each side of the cage to access either chamber. Green and red boxes represent the opaque colour feeders (6.5 x 7 cm and 7 cm high), each with a small perch in front of it. One feeder was rewarded, and the other was empty during a given test session. B) Photo of the test cage during a test session, showing the subject in the choice chamber before making a decision.

**Results of the corticosterone (CORT) and associative learning test**

The results shown are from the final models used and reported based on the comparison between the AIC values of all the models constructed based on various fixed and random factors. Non-significant fixed factors and random variables that did not explain the variations were removed from the final models.

# Juveniles associative learning

## Structural equation analyses

### Latency to choice

Table S1. The structural equation model with factors of Origin (temperature treatment condition: Stable vs Variable), CORT (log-transformed corticosterone concentrations pg/mg), and Latency (log-transformed value of latency to choice: seconds).

| **Coefficients:** |  | | | | | | | |
| --- | --- | --- | --- | --- | --- | --- | --- | --- |
| Response | Predictor | Estimate | Std. Error | DF | Crit. Value | P. Value | Std. Estimate |  |
| CORT | Origin | 0.3035 | 0.0814 | 66 | 3.7278 | 0.0004 | 0.2792 | *** |
| Latency | Origin | 0.654 | 0.2176 | 61 | 3.0058 | 0.0038 | 0.2768 | ** |
| Latency | CORT | -0.3148 | 0.1684 | 103 | -1.8694 | 0.0644 | -0.1448 |  |

### Participation rate

Table S2. The structural equation model with factors of Origin (temperature treatment condition: Stable vs Variable), CORT (log-transformed corticosterone concentrations pg/mg), and Participation (participation rate of individuals: 1 = participated, 0 = inactive).

| **Coefficients:** |  | | | | | | | |
| --- | --- | --- | --- | --- | --- | --- | --- | --- |
| Response | Predictor | Estimate | Std. Error | DF | Crit. Value | P. Value | Std. Estimate | |
| CORT | Origin | 0.3035 | 0.0814 | 66.1154 | 3.7278 | 0.0004 | 0.2781 | *** |
| Participation | Origin | -0.0262 | 0.0797 | 68.2719 | -0.3282 | 0.7437 | -0.028 |  |
| Participation | CORT | -0.1209 | 0.0549 | 239.3294 | -2.2025 | 0.0286 | -0.1412 | * |

### Temperature treatments affecting CORT

Table S3. The summary output from the linear mixed effect model (LMM) with the response variable of CORT (log-transformed pg/mg). The temperature condition (Origin: Stable vs Variable) was included as the fixed factor and Box (family ID) as the random factor (N = 246).

| **Fixed effects:** |  | | | | | | |
| --- | --- | --- | --- | --- | --- | --- | --- |
|  | Estimate | | Std. Error | df | t value | Pr(>|t|) |  |
| (Intercept) | 8.48498 | | 0.05787 | 65.23496 | 146.623 | < 2e-16 | *** |
| OriginVariable | 0.29569 | | 0.08244 | 65.35104 | 3.587 | 0.000641 | *** |
|  | | | | | | | |
| **Random effects:** | |  | | | | | |
| Groups | | Variance | | Std.Dev. |  |  |  |
| Box (Intercept) | | 0.04965 | | 0.2228 |  |  |  |
| Residual | | 0.22729 | | 0.4768 |  |  |  |

### Participation rate

Table S4. The summary output from the generalized linear mixed model (GLMM) with the temperature condition, CORT, and start time (centered) as the fixed factors. BoxID was included as a random factor (N = 246).

| **Fixed effects:** |  | | | | |
| --- | --- | --- | --- | --- | --- |
|  | Estimate | Std. Error | z value | Pr(>|z|) |  |
| (Intercept) | 10.89 | 3.5848 | 3.038 | 0.00238 | ** |
| OriginVariable | -0.2298 | 0.446 | -0.515 | 0.60644 |  |
| CORT | -1.1159 | 0.4125 | -2.706 | 0.00682 | ** |
| Start time | 1.0949 | 0.2645 | 4.14 | 3.48E-05 | *** |
|  | | | | | |
| **Random effects:** |  | | | | |
| Groups | Variance | Std.Dev. |  |  |  |
| BoxID (Intercept) | 1.152 | 1.073 |  |  |  |

### Latency to choice

Table S5. The summary output from the LMM with the temperature condition and CORT as the fixed factors. BoxID was included as a random factor (N = 167).

| **Fixed effects:** |  | | | | | |
| --- | --- | --- | --- | --- | --- | --- |
|  | Estimate | Std. Error | df | t value | Pr(>|t|) |  |
| (Intercept) | 6.7345 | 1.425 | 162.3791 | 4.726 | 4.94E-06 | *** |
| OriginVariable | 0.654 | 0.2176 | 62.1361 | 3.006 | 0.00382 | ** |
| CORT | -0.3148 | 0.1684 | 161.684 | -1.869 | 0.06338 | . |
|  | | | | | | |
| **Random effects:** |  | | | | | |
| Groups | Variance | Std.Dev. |  |  |  |  |
| BoxID (Intercept) | 0.2708 | 0.5203 |  |  |  |  |
| Residual | 1.0397 | 1.0196 |  |  |  |  |

Table S6. The summary output from the LMM with the temperature condition as the fixed factor. BoxID was included as a random factor (N = 177).

| **Fixed effects:** |  | | | | | |
| --- | --- | --- | --- | --- | --- | --- |
|  | Estimate | Std. Error | df | t value | Pr(>|t|) |  |
| (Intercept) | 4.0782 | 0.1431 | 57.3612 | 28.508 | <2e-16 | *** |
| OriginVariable | 0.4877 | 0.2033 | 60.7168 | 2.398 | 0.0196 | * |
|  | | | | | | |
| **Random effects:** |  | | | | | |
| Groups | Variance | Std.Dev. |  |  |  |  |
| BoxID (Intercept) | 0.2386 | 0.4885 |  |  |  |  |
| Residual | 1.0906 | 1.0443 |  |  |  |  |

### Learning performance

Table S7. The summary output from the GLMM with the temperature condition and CORT as the fixed factors. BoxID was included as a random factor (N = 167).

| **Fixed effects:** |  | | | |
| --- | --- | --- | --- | --- |
|  | Estimate | Std. Error | z value | Pr(>|z|) |
| (Intercept) | 5.63049 | 7.99814 | 0.704 | 0.481 |
| OriginVariable | 0.34528 | 1.50257 | 0.23 | 0.818 |
| CORT | 0.09639 | 0.92931 | 0.104 | 0.917 |
|  | | | | |
| **Random effects:** |  | | | |
| Groups | Variance | Std.Dev. |  |  |
| BoxID (Intercept) | 29.12 | 5.396 |  |  |

# Adulthood - Memory assessment

## 1-Month post learning

### Participation rate

Table S8. The summary output from the generalized linear mixed model (GLMM) with the temperature condition and CORT as the fixed factors. BoxID was included as a random factor (N = 150).

| **Fixed effects:** |  |  |  |  |
| --- | --- | --- | --- | --- |
|  | Estimate | Std. Error | z value | Pr(>|z|) |
| (Intercept) | -2.0624 | 2.8252 | -0.730 | 0.465 |
| OriginVariable | 0.5310 | 0.3868 | 1.373 | 0.170 |
| CORT | 0.3001 | 0.3346 | 0.897 | 0.370 |
|  |  |  |  |  |
| **Random effects:** |  |  |  |  |
| Groups | Variance | Std.Dev. |  |  |
| BoxID (Intercept) | 0.0688 | 0.2623 |  |  |

### Latency to choice

Table S9. The summary output from the LMM with the temperature condition and CORT as the fixed factors. BoxID was included as a random factor (N = 101).

| **Fixed effects:** |  |  |  |  |  |
| --- | --- | --- | --- | --- | --- |
|  | Estimate | Std. Error | df | t value | Pr(>|t|) |
| (Intercept) | -1.2862 | 2.5940 | 91.6850 | -0.496 | 0.6212 |
| OriginVariable | -0.4891 | 0.2999 | 46.4553 | -1.631 | 0.1097 |
| CORT | 0.5974 | 0.3039 | 90.6543 | 1.966 | 0.0524 |
|  |  |  |  |  |  |
| **Random effects:** |  |  |  |  |  |
| Groups | Variance | Std.Dev. |  |  |  |
| BoxID (Intercept) | 0.3716 | 0.6096 |  |  |  |
| Residual | 1.3872 | 1.1778 |  |  |  |

### Learning performance

Table S10. Generalized linear model (GLM) of the memory performance at 1-month post learning with temperature condition and CORT as fixed factors. BoxID as a random factor did not contribute to the variance of the model and was removed from the final analysis (N = 101).

| **Coefficients**: |  |  |  |  |
| --- | --- | --- | --- | --- |
|  | Estimate | Std. Error | z value | Pr(>|z|) |
| (Intercept) | 10.911 | 2478.488 | 0.004 | 0.996 |
| OriginVariable | -18.622 | 2478.470 | -0.008 | 0.994 |
| CORT | 1.152 | 1.179 | 0.977 | 0.329 |

## 4-Month memory assessment

### Participation (N = 96)

Fisher’s exact test for count data: p = 0.6998. No difference between groups.

Table S11. The distribution of the number of participated (1) and non-participated (0) birds across the four treatment groups.

|  | Stable-Stable | Stable-Variable | Variable-Stable | Variable-Variable |
| --- | --- | --- | --- | --- |
| 0 | 2 | 3 | 2 | 0 |
| 1 | 23 | 22 | 29 | 15 |

### Latency to choice

Table S12. LMM of the latency to choice at 4 months post learning with Group as the fixed factor. ColourID was included as a random factor (N = 89).

| **Fixed effects:** |  |  |  |  |  |  |
| --- | --- | --- | --- | --- | --- | --- |
|  | Estimate | Std. Error | df | t value | Pr(>|t|) |  |
| (Intercept) | 4.3366 | 0.3105 | 44.8269 | 13.966 | < 2e-16 | *** |
| GroupStable Variable | -0.6636 | 0.3735 | 70.4332 | -1.777 | 0.07991 | . |
| GroupVariable Stable | -0.3233 | 0.3727 | 84.5427 | -0.868 | 0.38806 |  |
| GroupVariable Variable | -1.4874 | 0.4387 | 81.9827 | -3.390 | 0.00108 | *** |
|  |  |  |  |  |  |  |
| **Random effects:** |  |  |  |  |  |  |
| Groups | Variance | Std.Dev. |  |  |  |  |
| colours (Intercept) | 0.403 | 0.6348 |  |  |  |  |
| Residual | 1.459 | 1.2079 |  |  |  |  |

### Learning performance

Table S13. GLMM of the memory performance at 4 months post learning with Group as the fixed factor. BoxID was included as a random factor (N = 89).

| Fixed effects: |  |  |  |  |  |
| --- | --- | --- | --- | --- | --- |
|  | Estimate | Std. Error | z value | Pr(>|z|) |  |
| (Intercept) | 9.7681 | 3.7009 | 2.639 | 0.00831 | ** |
| GroupStable Variable | -1.9912 | 2.7940 | -0.713 | 0.47606 |  |
| GroupVariable Stable | -2.3990 | 3.2282 | -0.743 | 0.45740 |  |
| GroupVariable Variable | -0.6776 | 3.5993 | -0.188 | 0.85067 |  |
|  |  |  |  |  |  |
| Random effects: |  |  |  |  |  |
| Groups | Variance | Std.Dev. |  |  |  |
| BoxID (Intercept) | 86.89 | 9.322 |  |  |  |

## 10-Month memory assessment

### Participation

Table S14. GLM of the participation rate at 10 months post learning with Group as the fixed factor. BoxID was included as a random factor (N = 76).

| **Fixed effects:** |  |  |  |  |
| --- | --- | --- | --- | --- |
|  | Estimate | Std. Error | z value | Pr(>|z|) |
| (Intercept) | 2.89037 | 1.02737 | 2.813 | 0.0049 |
| GroupStable Variable | 0.05407 | 1.45190 | 0.037 | 0.9703 |
| GroupVariable Stable | -0.53900 | 1.26614 | -0.426 | 0.6703 |
| GroupVariable Variable | -1.09861 | 1.28016 | -0.858 | 0.3908 |

### Latency to choice

Table S15. LMM of the latency to choice at 10 months post learning with Group as the fixed factor. BoxID was included as a random factor (N = 70).

| **Fixed effects:** |  |  |  |  |  |  |
| --- | --- | --- | --- | --- | --- | --- |
|  | Estimate | Std. Error | df | t value | Pr(>|t|) |  |
| (Intercept) | 3.2693 | 0.2605 | 49.4307 | 12.549 | <2e-16 | *** |
| GroupStable Variable | -0.3928 | 0.3565 | 51.3646 | -1.102 | 0.276 |  |
| GroupVariable Stable | -0.2704 | 0.3541 | 54.8944 | -0.763 | 0.448 |  |
| GroupVariable Variable | -0.6222 | 0.4103 | 58.2062 | -1.516 | 0.135 |  |
|  |  |  |  |  |  |  |
| **Random effects:** |  |  |  |  |  |  |
| Groups | Variance | Std.Dev. |  |  |  |  |
| BoxID (Intercept) | 0.05799 | 0.2408 |  |  |  |  |
| Residual | 1.14032 | 1.0679 |  |  |  |  |

### Learning performance

Table S16. GLM of the memory performance at 10 months post learning with Group as the fixed factor. BoxID was included as a random factor (N = 70).

| **Fixed effects:** |  |  |  |  |  |
| --- | --- | --- | --- | --- | --- |
|  | Estimate | Std. Error | z value | Pr(>|z|) |  |
| (Intercept) | 2.833e+00 | 1.029e+00 | 2.753 | 0.0059 | *** |
| GroupStable Variable | 5.716e-02 | 1.454e+00 | 0.039 | 0.9686 |  |
| GroupVariable Stable | 1.625e-01 | 1.452e+00 | 0.112 | 0.9109 |  |
| GroupVariable Variable | 1.673e+01 | 3.104e+03 | 0.005 | 0.9957 |  |

# Adulthood - Pattern associative learning

### Participation

Table S17. GLMM of the participation rate in pattern associative learning test with Group and start time as fixed factors. BoxID was included as a random factor (N = 251).

| **Fixed effects:** |  |  |  |  |  |
| --- | --- | --- | --- | --- | --- |
|  | Estimate | Std. Error | z value | Pr(>|z|) |  |
| (Intercept) | 0.2382 | 0.3027 | 0.787 | 0.4313 |  |
| GroupStable Variable | 0.9805 | 0.427 | 2.296 | 0.0217 | * |
| GroupVariable Stable | 0.8957 | 0.4521 | 1.981 | 0.0476 | * |
| GroupVariable Variable | 0.8277 | 0.4682 | 1.768 | 0.0771 | . |
| Start time | 0.3949 | 0.1674 | 2.359 | 0.0183 | * |
|  |  |  |  |  |  |
| **Random effects:** |  |  |  |  |  |
| Groups Name | Variance | Std.Dev. |  |  |  |
| BoxID (Intercept) | 0.5885 | 0.7671 |  |  |  |

### Latency to choice

Table S18. Linear mixed model (LMM) of the latency to choice in pattern associative learning test with Group as the fixed factor. BoxID did not explain the variance and was removed from the random factor (N = 172).

| Coefficients: |  |  |  |  |  |
| --- | --- | --- | --- | --- | --- |
|  | Estimate | Std. Error | t value | Pr(>|t|) |  |
| (Intercept) | 3.2001 | 0.146 | 21.925 | <2e-16 | *** |
| GroupStable Variable | -0.1381 | 0.1972 | -0.7 | 0.485 |  |
| GroupVariable Stable | -0.2648 | 0.1945 | -1.361 | 0.175 |  |
| GroupVariable Variable | -0.1851 | 0.2051 | -0.902 | 0.368 |  |

### Learning performance

Table S19. GLMM of the learning performance in pattern associative learning test with Group as the fixed factor. BoxID was included as a random factor (N = 172).

| Fixed effects: |  |  |  |  |  |
| --- | --- | --- | --- | --- | --- |
|  | Estimate | Std. Error | z value | Pr(>|z|) |  |
| (Intercept) | 0.80671 | 0.37561 | 2.148 | 0.0317 | * |
| GroupStable Variable | 0.04175 | 0.48959 | 0.085 | 0.932 |  |
| GroupVariable Stable | -0.04061 | 0.49172 | -0.083 | 0.9342 |  |
| GroupVariable Variable | -0.41651 | 0.50778 | -0.82 | 0.4121 |  |
|  |  |  |  |  |  |
| Random effects: |  |  |  |  |  |
| Groups | Variance | Std.Dev. |  |  |  |
| BoxID (Intercept) | 0.21 | 0.4583 |  |  |  |
